# Supplementary material
Source: HighWire-hosted journal article supplement (https://tobaccocontrol.bmj.com/content/tc-2024-059088)
Supplement: inline-supplementary-material-1 [file inline-supplementary-material-1.pdf]

Projected Timeline for Achieving Tobacco Endgame by Prefecture

Year when smoking prevalence reaches 5% (with 60% probability)

Time Period    ● Early (≤2045)    ● Mid (2046–2055)    ● Late (2056–2065)    ● Very Late (>2065)

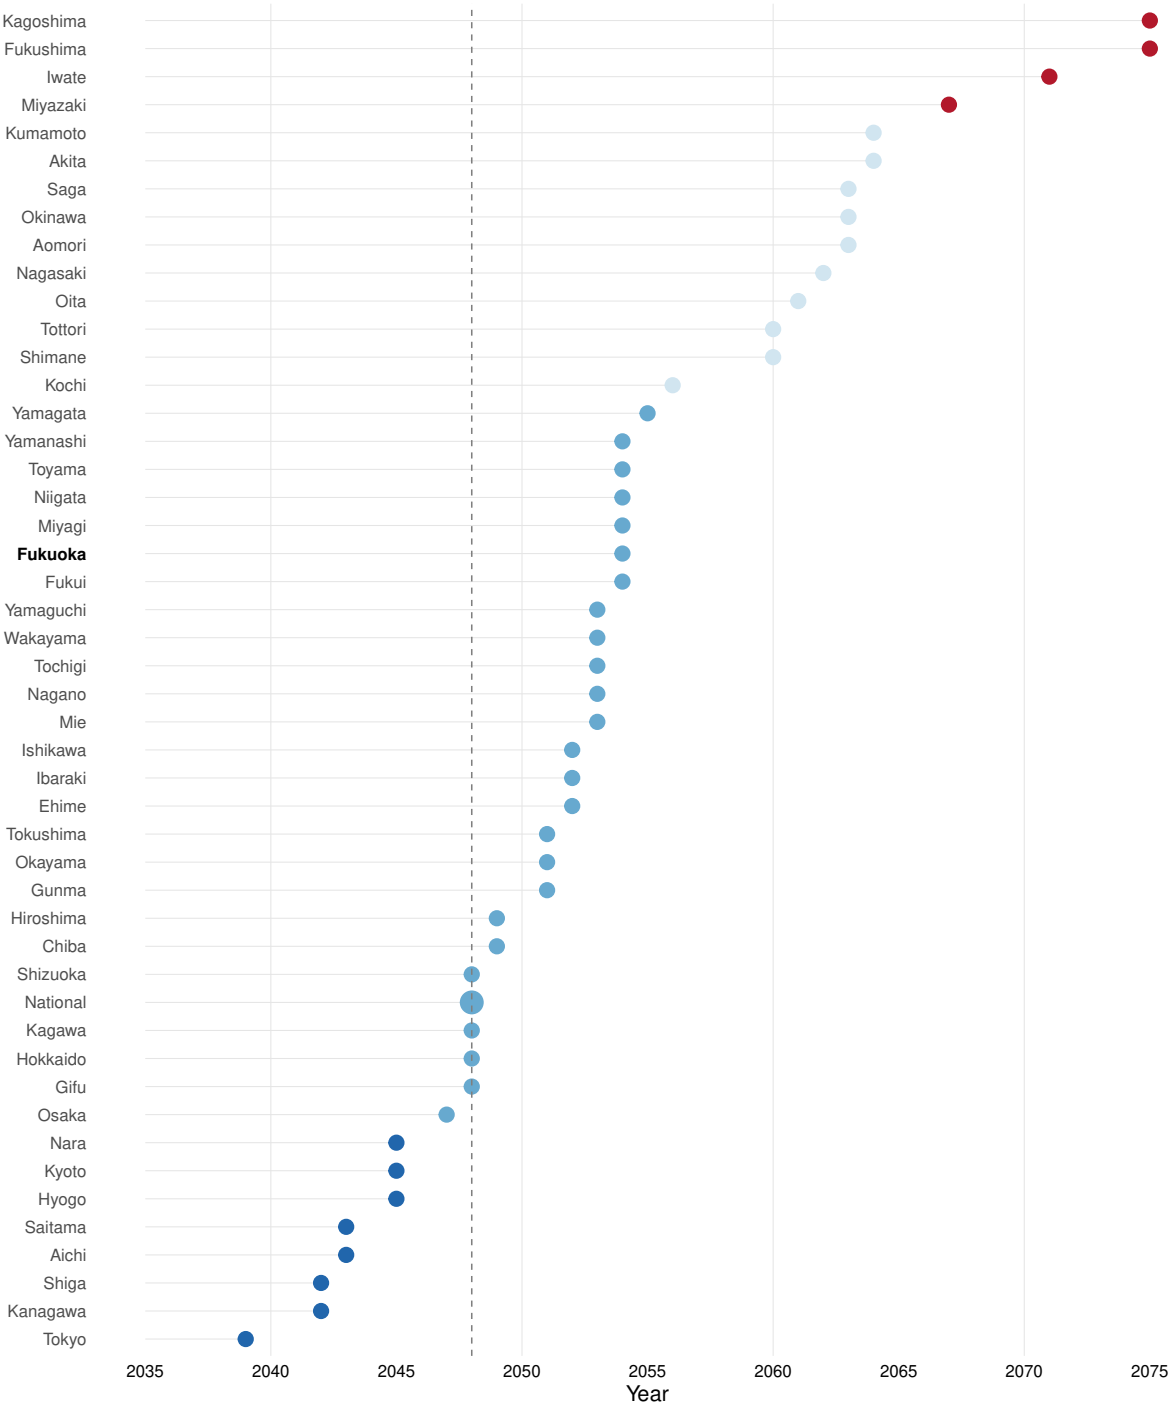

Note: Dashed line represents national average. Tobacco endgame defined as smoking prevalence of 5% or less.
